# Supplementary material for: The Intestinal Carriage of Plasmid-Mediated Colistin-Resistant Enterobacteriaceae in Tertiary Care Settings
Source: Antibiotics (Basel). 2021 Mar 4;10(3):258. doi: 10.3390/antibiotics10030258 (PMC8002115; doi:10.3390/antibiotics10030258)
Supplement: Supplementary file 1 [file antibiotics-10-00258-s001.xlsx]

## Sheet: Table S1
Supplementary Table S1: detailed annotation of plasmid IncX4-P1301A.
RAST			PROKKA			BRIG upload
Start	End	Description	Start	End	Description	Start	End	Description
2	304	hypothetical protein	86	304	hypothetical protein	2	304	-
395	745	hypothetical protein	395	745	hypothetical protein	395	745	-
821	958	hypothetical protein	821	958	hypothetical protein	821	958	-
1050	1298	HicA	1050	1298	hypothetical protein	1050	1298	hicA
1295	1642	HicB	1295	1642	hypothetical protein	1295	1642	hicB
1655	1780	hypothetical protein				1655	1780	-
2003	2506	ORF8	2003	2506	hypothetical protein	2003	2506	-
2510	3739	IncQ plasmid conjugative transfer DNA nicking endonuclease TraR (pTi VirD2 homolog)	2510	3739	hypothetical protein	2510	3739	traR
3816	4109	hypothetical protein	3816	4109	hypothetical protein	3816	4109	-
4106	4321	IncQ plasmid conjugative transfer protein TraG	4106	4321	hypothetical protein	4106	4321	traG
4498	4674	FIG01070085: hypothetical protein	4498	4674	hypothetical protein	4498	4674	-
4677	5249	Peptidoglycan hydrolase VirB1 2C involved in T-DNA transfer	4677	5249	hypothetical protein	4677	5249	virB1
5310	5636	FIG01068513: hypothetical protein	5310	5636	hypothetical protein	5310	5636	-
5655	8402	Inner membrane protein forms channel for type IV secretion of T-DNA complex2C VirB3 / ATPase required for both assembly of type IV secretion complex and secretion of T-DNA complex%2C VirB4	5655	8402	Type IV secretion system protein virB4	5655	8402	virB4
8414	9130	Minor pilin of type IV secretion complex%2C VirB5	8414	9130	hypothetical protein	8414	9130	virB5
9142	10236	Inner membrane protein of type IV secretion of T-DNA complex%2C VirB6	9142	10236	hypothetical protein	9142	10236	virB6
10233	10412	hypothetical protein	10233	10412	hypothetical protein	10233	10412	-
10414	10617	hypothetical protein				10414	10617	-
10751	11437	hypothetical protein	10751	11437	Type IV secretion system protein virB8	10751	11437	virB8
11437	12342	hypothetical protein	11434	12342	Type IV secretion system protein virB9	11437	12342	virB9
12335	13453	Inner membrane protein of type IV secretion of T-DNA complex%2C TonB-like%2C VirB10	12335	13453	hypothetical protein	12335	13453	virB10
13455	14483	ATPase required for both assembly of type IV secretion complex and secretion of T-DNA complex%2C VirB11	13455	14483	Type IV secretion system protein VirB11	13455	14483	virB11
14515	16332	hypothetical protein	14515	16332	hypothetical protein	14515	16332	-
16344	16763	hypothetical protein	16344	16763	hypothetical protein	16344	16763	-
16765	17052	IncN plasmid KikA protein	16747	17052	hypothetical protein	16765	17052	hikA
17213	17359	Cell division protein FtsH (EC 3.4.24.-);Ontology_term=KEGG_ENZYME:3.4.24.-				17213	17359	ftsH
17363	17935	FIG01045518: hypothetical protein	17363	17935	hypothetical protein	17363	17935	-
17940	20093	DNA topoisomerase III%2C TraE-type (EC 5.99.1.2);Ontology_term=KEGG_ENZYME:5.99.1.2	17940	20093	DNA topoisomerase 3	17940	20093	topB
20090	20296	Haemolysin expression modulating protein	20090	20296	Modulating protein YmoA	20090	20296	ymoA
20314	20778	DNA-binding protein H-NS	20314	20778	DNA-binding protein H-NS	20314	20778	hns
20865	21569	Mobile element protein	20865	21569	IS6 family transposase IS26	20865	21569	IS6 family transposase IS26
21853	21972	hypothetical protein				21853	21972	-
22517	22696	hypothetical protein	22517	22696	hypothetical protein	22517	22696	-
23110	23757	hypothetical protein	23110	23757	hypothetical protein	23110	23757	-
23832	24101	hypothetical protein	23832	24101	hypothetical protein	23832	24101	-
24262	24966	hypothetical protein	24262	24966	hypothetical protein	24262	24966	-
25034	25939	Transposase InsD for insertion element IS2	25034	25939	IS3 family transposase IS2	25034	25939	IS3 family transposase IS2
25897	26262	Transposase InsC for insertion element IS2	25897	26262	hypothetical protein	25897	26262	IS3 family transposase IS2
26546	28021	Lipid A phosphoethanolamine transferase%2C putative	26396	28021	phosphoethanolamine--lipid A transferase MCR-1.1	26546	28021	mcr-1.1
28093	28815	hypothetical protein	28069	28815	hypothetical protein	28093	28815	-
29206	29733	hypothetical protein	29206	29733	hypothetical protein	29206	29733	-
29868	30272	hypothetical protein	29868	30272	hypothetical protein	29868	30272	-
30285	31151	hypothetical protein	30285	31157	PI protein	30285	31151	-
31606	31731	hypothetical protein	31606	31731	hypothetical protein	31606	31731	-
32276	32428	hypothetical protein				32276	32428	-
32566	33081	Chaperone protein DnaJ	32566	33081	Chaperone protein DnaJ	32566	33081	dnaJ
33186	33728	FIG00643553: hypothetical protein	33186	33728	hypothetical protein	33186	33728	-
33725	33976	FIG00643296: hypothetical protein	33725	33976	hypothetical protein	33725	33976	-
33963	34190	FIG00640100: hypothetical protein	33963	34190	hypothetical protein	33963	34190	-
34356	34508	hypothetical protein				34356	34508	-

## Sheet: Table S2
Supplementary Table S2: Genomic epidemiological analysis of relationship of mcr-positive isolates to available published genomes (based on cgMLST strategy)
Analysis was performed using BacWGSTdb 2.0 database, threshold of 100 allel difference was used to limit the search of close isolates. mcr-1 carrying isolates are highlighted.
Isolate in our study	Isolate	Accession number	Different alleles	ST	Host	Disease	Isolation source	Country:State	Collection year	Antimicrobial resistance genes
P642A
	None isolate found with selected threshold
P732A
	MOD1_EC6104	NMCY01	46	69	Dasypodidae	-	Intestine-Large	USA:CA	2011	aac(3)-IId,aph(3'')-Ib,aph(3')-Ia,aph(6)-Id,blaTEM-1B,dfrA17,mdf(A),sul2,tet(B)
	908585	AXTT01	54	69	Human	-	-	-	-	aac(3)-IId,aadA5,aph(3'')-Ib,aph(6)-Id,blaTEM-1B,catA1,dfrA17,mdf(A),mph(A),sul1,sul2,tet(B)
	SC98	VDJO01	54	69	Chicken	-	-	-	-	aac(3)-IId,aadA5,aph(3'')-Ib,aph(3')-Ia,aph(6)-Id,mcr-1.1,blaTEM-1B,catA1,dfrA17,mdf(A),mph(A),sul1,sul2,tet(B)
	941A	UIID01	55	69	-	-	Rectal swab	France	2018	aac(3)-IId,aadA5,aph(3'')-Ib,aph(3')-Ia,aph(6)-Id,blaTEM-1B,catA1,dfrA17,mdf(A),mph(A),sul1,sul2,tet(B)
	LVSTRB142	SQHF01	56	69	Human	-	clinical sample	Latvia	2012	blaCMY-2,mdf(A)
	upec_114	JSOM01	74	69	Human	-	-	USA: WA	2011	mdf(A)
	007PP2015	LWSE01	83	69	Turkey	-	sick domestic birds	Poland	2015	aac(3)-IId,aadA5,aph(3'')-Ib,aph(6)-Id,mcr-1.1,blaTEM-1B,catA1,dfrA17,mdf(A),mph(A),sul1,sul2,tet(B)
	ECG023	LZOE01	92	69	Human	-	-	India	2012	aph(3'')-Ib,aph(6)-Id,blaTEM-1B,dfrA17,mdf(A),sul2,tet(B)
	1_20_2	VRXW01	99	69	Human	-	-	Russia: Kazan	2017	aac(3)-IId,aadA5,blaTEM-1B,dfrA17,mdf(A),sul1
P1301A
	sheep33	LVQC01	63	744	Sheep	-	feces	China:Qinghai	2013	aph(3'')-Ib,aph(3')-Ia,aph(6)-Id,blaCTX-M-55,blaTEM-1B,catA1,mdf(A),sul2,tet(B)
	26_CAASB	SCJQ01	69	744	Human	CAASB	urine	USA: St. Louis, MO	2010	aadA5,aph(3'')-Ib,aph(3')-Ia,aph(6)-Id,blaTEM-1B,catA1,dfrA17,mdf(A),mph(A),sul1,sul2,tet(B)
	sheep35	LVQE01	71	744	Sheep	-	feces	China:Qinghai	2013	aph(3'')-Ib,aph(3')-Ia,aph(6)-Id,blaCTX-M-55,catA1,mdf(A),sul2,tet(B)
	VREC0594	UDAJ01	74	744	Turkey	-	feces	United Kingdom	2015	mdf(A),tet(B)
	G047p	RYAJ01	75	744	Pig	-	fecal sample	China:Shandong	2015	aadA5,aph(3'')-Ib,aph(3')-Ia,aph(6)-Id,blaNDM-1,blaTEM-1B,catA1,dfrA17,mdf(A),mph(A),sul1,sul2,tet(B)
	GER_MD02_1505_Eco_034	PUSM01	75	744	Dog	-	military dog fecal sample	Germany	2015	aadA5,aph(3'')-Ib,aph(6)-Id,blaCTX-M-14,blaTEM-1B,catA1,dfrA17,floR,mdf(A),mph(A),sul1,sul2,tet(B)
	GER_MD02_1505_Eco_040	PUSG01	75	744	Dog	-	military dog fecal sample	Germany	2015	aadA5,aph(3'')-Ib,aph(6)-Id,blaCTX-M-14,blaTEM-1B,catA1,dfrA17,floR,mdf(A),mph(A),sul1,sul2,tet(B)
	GER_MD11_1505_Eco_030	PUSP01	75	744	Dog	-	military dog fecal sample	Germany	2015	aadA5,aph(3'')-Ib,aph(6)-Id,blaCTX-M-14,blaTEM-1B,catA1,dfrA17,floR,mdf(A),mph(A),sul1,sul2,tet(B)
	GER_MD03_1505_Eco_010	PUTH01	76	744	Dog	-	military dog fecal sample	Germany	2015	aadA5,aph(3'')-Ib,aph(6)-Id,blaCTX-M-14,blaTEM-1B,catA1,dfrA17,floR,mdf(A),mph(A),sul1,sul2,tet(B)
	GER_MD03_1505_Eco_011	PUTG01	76	744	Dog	-	military dog fecal sample	Germany	2015	aadA5,aph(3'')-Ib,aph(6)-Id,blaCTX-M-14,blaTEM-1B,catA1,dfrA17,floR,mdf(A),mph(A),sul1,sul2,tet(B)
	GER_MD03_1505_Eco_018	PUSZ01	76	744	Dog	-	military dog fecal sample	Germany	2015	aadA5,aph(3'')-Ib,aph(6)-Id,blaCTX-M-14,blaTEM-1B,catA1,dfrA17,floR,mdf(A),mph(A),sul1,sul2,tet(B)
	GER_MD06_1505_Eco_002	PUTO01	76	744	Dog	-	military dog fecal sample	Germany	2015	aadA5,aph(3'')-Ib,aph(6)-Id,blaCTX-M-14,blaTEM-1B,catA1,dfrA17,floR,mdf(A),mph(A),sul1,sul2,tet(B)
	GER_MD06_1505_Eco_007	PUTJ01	76	744	Dog	-	military dog fecal sample	Germany	2015	aadA5,aph(3'')-Ib,aph(6)-Id,blaCTX-M-14,blaTEM-1B,catA1,dfrA17,floR,mdf(A),mph(A),sul1,sul2,tet(B)
	GER_MD11_1505_Eco_026	PUSS01	76	744	Dog	-	military dog fecal sample	Germany	2015	aadA5,aph(3'')-Ib,aph(3')-Ia,aph(6)-Id,blaCTX-M-1,blaCTX-M-14,blaTEM-1B,catA1,dfrA17,floR,mdf(A),mph(A),sul1,sul2,tet(B),tet(M)
	EELTKB273	SQAH01	77	744	Human	-	clinical sample	Estonia	2012	aadA5,aph(3'')-Ib,aph(3')-Ia,aph(6)-Id,catA1,dfrA17,mdf(A),mph(A),sul1,sul2,tet(B)
	1223	CP023383	81	744	Dog	-	urinary tract infections	United Kingdom: Scotland, Edinburgh	2002	aadA5,aph(3')-Ia,catA1,dfrA17,mdf(A),mph(A),sul1,tet(B)
	G42	VDLB01	87	744	Human	-	feces	-	-	aadA5,aph(3'')-Ib,aph(3')-Ia,aph(6)-Id,blaCTX-M-55,mcr-1.1,blaTEM-1B,catA1,dfrA17,floR,mdf(A),mph(A),sul1,sul2,tet(A),tet(B)
	GBGD42	RQUI01	87	744	Human	Colonization	Gut	China:Guangdong	2014	aadA5,aph(3'')-Ib,aph(3')-Ia,aph(6)-Id,blaCTX-M-55,mcr-1.1,blaTEM-1B,catA1,dfrA17,floR,mdf(A),mph(A),sul1,sul2,tet(A),tet(B)
	VRES0684	UDHV01	88	744	Chicken	-	meat	United Kingdom	2015	aadA5,aph(3'')-Ib,aph(3')-Ia,aph(6)-Id,blaCTX-M-8,catA1,dfrA17,mdf(A),sul1,sul2,tet(B)
	NIFDS_EC2017_203	WVVC01	90	744	-	-	Chicken meat	South Korea	2017	aadA5,aph(3'')-Ib,aph(3')-Ia,aph(6)-Id,blaSHV-12,blaTEM-1B,catA1,dfrA17,floR,mdf(A),mph(A),sul1,sul2,tet(A)
	4488	JAATKQ01	91	744	Human	-	feces	Brazil: Sao Paulo	2016	aac(3)-VIa,aac(6')-Ib-cr,aadA1,aadA5,aph(3'')-Ib,aph(3')-Ia,aph(6)-Id,blaCMY-2,mcr-1.1,blaOXA-1,blaTEM-1B,catA1,dfrA14,dfrA17,mdf(A),mph(A),sul1,sul2,tet(B)
	105547	LOJM01	92	744	Human	Infection	wound	USA: Fort Sam, Houston	2009	aac(3)-IIa,aac(3)-IId,aac(6')-Ib-cr,aadA2,aadA5,aph(3'')-Ib,aph(6)-Id,blaCTX-M-15,blaOXA-1,blaTEM-1B,catA1,dfrA12,dfrA17,mdf(A),mph(A),sul1,sul2,tet(A),tet(B)
	4487	JAATKP01	92	744	Human	-	feces	Brazil: Sao Paulo	2016	aac(3)-VIa,aac(6')-Ib-cr,aadA1,aadA5,aph(3'')-Ib,aph(3')-Ia,aph(6)-Id,blaCMY-2,mcr-1.1,blaOXA-1,blaTEM-1B,catA1,dfrA14,dfrA17,mdf(A),mph(A),sul1,sul2,tet(B)
	KCJK4937	NTET01	92	744	-	-	Feces	USA: FL	2015	aac(3)-IIa,aadA1,aadA5,aph(3'')-Ib,aph(3')-Ia,aph(6)-Id,blaCTX-M-55,catA1,dfrA17,floR,mdf(A),sul1,sul2,sul3,tet(A),tet(B)
	418A	UIHJ01	93	744	-	-	Rectal swab	France	2018	aadA5,aph(3'')-Ib,aph(6)-Id,blaTEM-1B,catA1,dfrA17,mdf(A),mph(A),sul1,sul2,tet(B)
	AS012392	VKVE01	93	744	Human	Pneumonia	lung	USA	2015	aadA5,aph(3'')-Ib,aph(3')-Ia,aph(6)-Id,blaCTX-M-55,blaTEM-1B,dfrA17,mdf(A),sul1,sul2,tet(A),tet(B)
	ecoli024	UWXP01	94	744	Human	-	hospital	Switzerland	2016	aph(3'')-Ib,aph(3')-Ia,aph(6)-Id,blaOXA-48,blaTEM-1B,catA1,dfrA14,mdf(A),sul2,tet(B)
	NX_F9_1	PTOF01	94	744	Cow	-	-	China: Ningxia	2017	aac(3)-IId,aadA2,aph(3'')-Ib,aph(6)-Id,blaCTX-M-55,catA1,dfrA12,fosA3,mdf(A),mph(A),oqxA,oqxB,sul2,tet(A)
	TUM11414	BGKP01	94	744	Human	-	-	Japan	2012	aph(3'')-Ib,aph(6)-Id,floR,fosA3,mdf(A),sul2,tet(B)
	E003	NXIZ01	95	744	Human	-	blood	South Africa:Pretoria	2013	aadA5,aph(3'')-Ib,aph(6)-Id,blaCMY-2,catA1,dfrA17,mdf(A),sul1,sul2,tet(B)
P1519A
	Eco04553	CACRXW01	31	1193	Human	-	clinical material	South Africa	2017	aph(3'')-Ib,aph(6)-Id,blaTEM-1B,dfrA17,mdf(A),sul2,tet(B)
	Eco04554	CACRYA01	31	1193	Human	-	clinical material	South Africa	2017	aph(3'')-Ib,aph(6)-Id,blaTEM-1B,dfrA17,mdf(A),sul2,tet(B)
	Eco04558	CACRYF01	31	1193	Human	-	clinical material	South Africa	2017	aph(3'')-Ib,aph(6)-Id,blaTEM-1B,dfrA17,mdf(A),sul2,tet(B)
	KTE157	ANYH01	32	1193	Human	-	faecal	-	2010	aph(3'')-Ib,aph(6)-Id,blaTEM-1B,dfrA17,mdf(A),mph(A),sul2,tet(B)
	KTE219	ASUN01	32	1193	Human	-	Urinary tract	-	2010	aph(3'')-Ib,aph(6)-Id,blaTEM-1B,dfrA17,mdf(A),mph(A),sul2,tet(B)
	Eco04557	CACRXV01	33	1193	Human	-	clinical material	South Africa	2017	aadA5,aph(3'')-Ib,aph(6)-Id,blaCTX-M-27,dfrA17,mdf(A),mph(A),sul1,sul2,tet(A)
	NOR4_73	SQFK01	34	1193	Human	-	clinical sample	Norway	2012	aph(3'')-Ib,aph(6)-Id,blaCTX-M-55,blaTEM-1B,mdf(A),sul2
	789	RAHE01	35	1193	Human	Urinary infection	urine	Argentina	2016	aph(3'')-Ib,aph(6)-Id,blaTEM-1B,mdf(A),mph(A),sul2
	UMB5978	RRUV01	35	1193	Human	-	urine	USA: Maywood, IL	-	aph(3'')-Ib,aph(6)-Id,blaTEM-1B,dfrA17,mdf(A),mph(A),sul2,tet(B)
	CVAST0265	NFTX01	36	1193	Human	-	Rectal swab	USA: Minnesota	2016	aadA1,aph(3'')-Ib,aph(6)-Id,dfrA1,floR,mdf(A),sul2,tet(A)
	HH15H	VNYP01	36	1193	Human	-	feces	Bangladesh	2016	erm(B),mdf(A)
	UMB0928	RRWM01	36	1193	Human	-	urine	USA: Maywood, IL	-	aph(3'')-Ib,aph(6)-Id,blaTEM-1B,dfrA17,mdf(A),sul2,tet(B)
	952A	UIIU01	37	1193	-	-	Rectal swab	France	2018	mdf(A)
	EC16_ST1193C	RDVO01	37	1193	-	-	-	-	2013	aph(3'')-Ib,aph(6)-Id,blaTEM-1B,dfrA17,mdf(A),sul2,tet(B)
	BIDMC_72	JMVE01	38	1193	Human	-	URINE	Boston, MA, USA	2013	aadA5,aph(3'')-Ib,aph(6)-Id,blaTEM-1B,mdf(A),mph(A),sul1,sul2,tet(A)
	upec_257	JSJK01	38	1193	Human	-	-	USA: WA	2012	aph(3'')-Ib,aph(6)-Id,blaTEM-1B,dfrA17,mdf(A),mph(A),sul2,tet(B)
	AS012441	VKTP01	40	1193	Human	Pneumonia	lung	USA	2015	aac(3)-IId,aadA5,aph(3'')-Ib,aph(6)-Id,blaTEM-1B,dfrA17,mdf(A),mph(A),sul1,sul2,tet(A)
	blood_09_1545	JSQV01	40	1193	Human	-	blood	USA: Pacific Northwest	2009	aac(3)-IId,aph(3'')-Ib,aph(6)-Id,blaTEM-1B,dfrA14,mdf(A),sul2,tet(D)
	CVAST2408	NFTY01	40	1193	Human	-	Rectal swab	USA: Minnesota	2016	aadA1,aph(3'')-Ib,aph(6)-Id,dfrA1,floR,mdf(A),sul2,tet(A)
	MCJCHV_1	CP030111	40	1193	Human	Neonatal bacterial meningitis	CSF	USA: Nashville, TN	2015	mdf(A)
	MDRO_M_054_ESBL	WJQW01	40	1193	Human	Gut colonization	Rectal swab	Switzerland	2018	aac(3)-IIa,aac(6')-Ib-cr,blaCTX-M-15,blaOXA-1,mdf(A)
	239A	UIMQ01	41	1193	-	-	Rectal swab	France	2018	aph(3'')-Ib,aph(6)-Id,blaTEM-1B,dfrA17,mdf(A),sul2,tet(B)
	555_ECOL	JVCI01	41	1193	Human	-	-	USA: WA	-	aph(3'')-Ib,aph(6)-Id,blaTEM-1B,mdf(A),mph(A),sul2
	TUM18725	BGXE01	41	1193	Human	-	-	Japan	2017	aadA5,aph(3'')-Ib,aph(6)-Id,blaCMY-2,blaTEM-1B,dfrA17,mdf(A),mph(A),sul1,sul2,tet(A)
	JML036	BFNF01	42	1193	Human	-	-	Japan	2015	aph(3'')-Ib,aph(6)-Id,mdf(A),sul2
	KCRI_598A	UEMR01	42	1193	Human	-	Swab	Moshi	2015	aph(3'')-Ib,aph(6)-Id,blaTEM-1B,dfrA17,mdf(A),mph(A),sul2,tet(B)
	CVAST0752	NFTZ01	43	1193	Human	-	Rectal swab	USA: Minnesota	2016	aph(3'')-Ib,aph(6)-Id,blaTEM-1B,dfrA17,mdf(A),sul2,tet(B)
	ECSC039	BFII01	43	1193	Human	-	-	Japan	2002	aac(3)-IId,aadA5,aph(3'')-Ib,aph(6)-Id,blaTEM-1B,dfrA17,mdf(A),mph(A),sul1,sul2,tet(A)
	upec_227	JSKM01	43	1193	Human	-	-	USA: WA	2011	aac(3)-IId,aadA5,aph(3'')-Ib,aph(6)-Id,blaTEM-1B,dfrA17,mdf(A),mph(A),sul1,sul2,tet(A)
	BIDMC105	LEUJ01	44	1193	Human	-	-	-	2014	aadA5,aph(3'')-Ib,aph(6)-Id,blaCTX-M-27,dfrA17,mdf(A),mph(A),sul1,sul2,tet(A)
	CVAST2812	NFUA01	45	1193	Human	-	Rectal swab	USA: Minnesota	2016	aph(3'')-Ib,aph(6)-Id,blaTEM-1B,dfrA17,mdf(A),sul2,tet(B)
	TUM18706	BGWL01	45	1193	Human	-	-	Japan	2017	aac(3)-IId,blaCTX-M-14,blaTEM-1B,mdf(A),mph(A)
	TUM18729	BGXI01	45	1193	Human	-	-	Japan	2017	blaCTX-M-14,blaTEM-1B,mdf(A),mph(A)
	URMC_138	RZBH01	45	1193	Human	urinary tract infection	urine	USA: Rochester, NY	2018	aac(3)-IId,aadA2,blaCTX-M-27,blaTEM-1B,dfrA12,erm(B),mdf(A),mph(A),sul1
	URMC_151	RZBV01	45	1193	Human	urinary tract infection	urine	USA: Rochester, NY	2018	aadA5,aph(3'')-Ib,aph(6)-Id,blaCTX-M-27,dfrA17,mdf(A),mph(A),sul1,sul2,tet(A)
	BR14_DEC	CP035330	47	1193	Human	Urinary tract infection	urine	Brazil: Botucatu, Sao Paulo State	2015	mdf(A)
	ecoli005	UWVJ01	47	1193	Human	-	hospital	Switzerland	2017	aph(3'')-Ib,aph(6)-Id,blaTEM-1B,mdf(A),mph(A),sul2
	TUM18611	BGSU01	48	1193	Human	-	-	Japan	2017	aac(3)-IId,blaTEM-1B,mdf(A)
	TUM18672	BGVD01	50	1193	Human	-	-	Japan	2016	aadA5,aph(3'')-Ib,aph(6)-Id,blaCTX-M-27,dfrA17,mdf(A),mph(A),sul1,sul2,tet(A)
	URMC_176	RZCR01	50	1193	Human	urinary tract infection	urine	USA: Rochester, NY	2018	blaCTX-M-27,erm(B),mdf(A)
	BIDMC_73	JMVF01	51	1193	Human	-	URINE	Boston, MA, USA	2013	aph(3'')-Ib,aph(6)-Id,dfrA17,mdf(A),mph(A),sul2,tet(B)
	JML075	BFOP01	51	1193	Human	-	-	Japan	2015	aph(3'')-Ib,aph(6)-Id,blaTEM-1B,mdf(A),mph(A),sul2
	TUM18722	BGXB01	51	1193	Human	-	-	Japan	2017	aac(3)-IId,aadA5,aph(3'')-Ib,aph(6)-Id,blaCTX-M-14,blaTEM-1B,dfrA17,mdf(A),mph(A),sul1,sul2,tet(A)
	HE_MDREc19	MCJV01	52	1193	Human	-	-	United States	2014	aac(3)-IId,aadA5,aph(3'')-Ib,aph(6)-Id,blaCMY-4,blaTEM-1B,dfrA17,mdf(A),mph(A),sul1,sul2,tet(A)
	CoR_14	NIRW01	53	1193	Human	Pulmonary infection	Sputum culture	China: Hangzhou	2015	aadA5,aph(3'')-Ib,aph(6)-Id,blaCTX-M-55,blaTEM-1B,dfrA17,mdf(A),mph(A),sul1,sul2,tet(A)
	UMB5924	RRUW01	53	1193	Human	-	urine	USA: Maywood, IL	-	aac(3)-IId,aadA5,aph(3'')-Ib,aph(6)-Id,blaTEM-1B,dfrA17,mdf(A),mph(A),sul1,sul2,tet(A)
	URMC_116	RZAN01	54	1193	Human	urinary tract infection	urine	USA: Rochester, NY	2018	aadA5,aph(3'')-Ib,aph(6)-Id,blaCTX-M-27,dfrA17,erm(B),mdf(A),mph(A),sul1,sul2,tet(A)
	CoR_13	NIRV01	55	1193	Human	Pulmonary infection	Sputum culture	China: Hangzhou	2015	aadA5,aph(3'')-Ib,aph(6)-Id,blaCTX-M-55,blaTEM-1B,dfrA17,mdf(A),mph(A),sul1,sul2,tet(A)
	CVAST1400	NFSG01	55	1193	Human	-	Rectal swab	USA: Minnesota	2016	aac(3)-IId,blaTEM-1B,mdf(A)
	EC33	SORR01	55	1193	Human	urinary tract infection	urine sample	China:Hangzhou	2017	aadA5,aph(3'')-Ib,aph(6)-Id,blaCTX-M-27,dfrA17,mdf(A),mph(A),sul1,sul2,tet(A)
	TUM18576	BGRL01	55	1193	Human	-	-	Japan	2017	aac(3)-IId,aadA5,aph(6)-Id,blaTEM-1B,mdf(A),mph(A),sul1,sul2,tet(A)
	TUM18574	BGRJ01	56	1193	Human	-	-	Japan	2017	aadA5,aph(3'')-Ib,aph(6)-Id,blaCTX-M-14,blaTEM-1B,dfrA17,mdf(A),mph(A),sul1,sul2,tet(A)
	ECPUTH03	NQDN01	57	1193	Human	sick	Patient	Thailand: Bangkok	2016	aac(3)-IId,aadA5,aph(3'')-Ib,aph(6)-Id,blaCTX-M-55,blaTEM-1B,catA2,dfrA17,mdf(A),mph(A),sul1,sul2,tet(A)
	ECSC073	BFJL01	57	1193	Human	-	-	Japan	2008	aac(3)-IId,aadA5,aph(3'')-Ib,aph(6)-Id,blaTEM-1B,dfrA17,mdf(A),mph(A),sul1,sul2,tet(A)
	LVEASB12	SQKH01	62	1193	Human	-	clinical sample	Latvia	2012	aac(3)-IId,aadA5,aph(3'')-Ib,aph(6)-Id,blaCTX-M-14,blaTEM-1B,dfrA17,mdf(A),mph(A),sul1,sul2,tet(A)
	TUM18549	BGQK01	64	1193	Human	-	-	Japan	2016	aadA5,aph(3'')-Ib,aph(6)-Id,blaTEM-1B,dfrA17,mdf(A),mph(A),sul1,sul2,tet(A)
	C32	CP041620	65	NA	-	-	soil	South Korea	2019	mdf(A)
	JML023	BFMU01	69	1193	Human	-	-	Japan	2015	aac(3)-IId,blaTEM-1B,mdf(A)
	809B	UIMT01	71	1193	-	-	Rectal swab	France	2018	aadA5,aph(3'')-Ib,aph(6)-Id,blaTEM-1B,dfrA17,mdf(A),mph(A),sul1,sul2,tet(A)
	TUM18679	BGVK01	71	1193	Human	-	-	Japan	2016	blaCTX-M-55,blaTEM-1B,mdf(A)
	GN05128	LVSA01	80	1193	Human	Bloodstream infection	-	United States	2013	aph(3'')-Ib,aph(6)-Id,blaTEM-1B,dfrA17,mdf(A),mph(A),sul2,tet(B)
	EEPERB138	SQNR01	86	1193	Human	-	clinical sample	Estonia	2012	aac(3)-IId,aadA5,aph(3'')-Ib,aph(6)-Id,blaCTX-M-88,blaTEM-1B,dfrA17,mdf(A),mph(A),sul1,sul2,tet(A)
	1_9_R6	MOYP01	92	1193	Human	-	feces	Australia: Sydney	2009	aac(3)-IId,aadA5,aph(3'')-Ib,aph(6)-Id,blaTEM-1B,dfrA17,mdf(A),mph(A),sul1,sul2,tet(A)
	BA6159	RCAI01	93	1193	Human	bloodstream infection	blood	India: Vellore	2017	ARR-3,aac(3)-IIa,aac(6')-Ib-cr,aph(3'')-Ib,aph(6)-Id,blaCTX-M-15,blaOXA-1,blaOXA-10,blaOXA-9,blaTEM-1A,cmlA1,dfrA17,mdf(A),qnrA1,sul1,sul2,tet(B)

## Sheet: Table S3
Supplementary Table S3: The primers used to detect the mcr-1 to mcr-8 genes.
qPCR	Target gene	Oligo name	Sequence 5´-3´	Product size (bp)	Accession no. of	Ref.
					reference
1	mcr-1	CLR5-R	CGGTCAGTCCGTTTGTTC	309	KP347127	[3]
		CLR5-F	CTTGGTCGGTCTGTAGGG
	mcr-2	MCR2-IR-F	TGTTGCTTGTGCCGATTGGA	567	LT598652	[35]
		MCR2-IR-R	AGATGGTATTGTTGGTTGCTG
	mcr-3	MCR3-F	TTGGCACTGTATTTTGCATTT	542	KY924928	[36]
		MCR3-R	TTAACGAAATTGGCTGGAACA
	mcr-4	MCR4-F	ATTGGGATAGTCGCCTTTTT	487	MF543359	[37]
		MCR4-R	TTACAGCCAGAATCATTATCA
	mcr-5	MCR5-F-int	TATCTCGACAAGGCCATGCTG	613	KY807921	[38]
		MCR5-R-int	GAATCTGGCGTTCGTCGTAGT
2	mcr-6	mcr_6_F	TGCTCTATGTCAGCGACCAC	228	MF176240	[39]
		mcr_6_R	TGCGGTCTTTGACCTTATCC
	mcr-7	mcr_7.1_F	AGGGGATAAACCGACCCTGA	335	MG267386	[40]
		mcr_7.1_R	TGATCTCGATGTTGGGCACC
	mcr-8	MCR_8F	AACCGCCAGAGCACAGAATT	667	MG736312	[41]
		MCR_8R	TTCCCCCAGCGATTCTCCAT
mcr-1 promoter region		mcr1_137_F	CAGTATGGGATTGCGCAATGA	1567*	This study	This study
		mcr1_891_R	AAGAAAACGGCAACACTCGC
	* 1567 bp is the expected size of the amplicon in P1301A based on the results of WGS.
